# Supplementary material for: Morphoagronomic characterization and whole-genome resequencing of eight highly diverse wild and weedy S. pimpinellifolium and S. lycopersicum var. cerasiforme accessions used for the first interspecific tomato MAGIC population
Source: PubMed Central journal article supplement (PMC7603519; doi:10.1038/s41438-020-00395-w), 2020-11-01

# Chromosome 1 homozygous variants

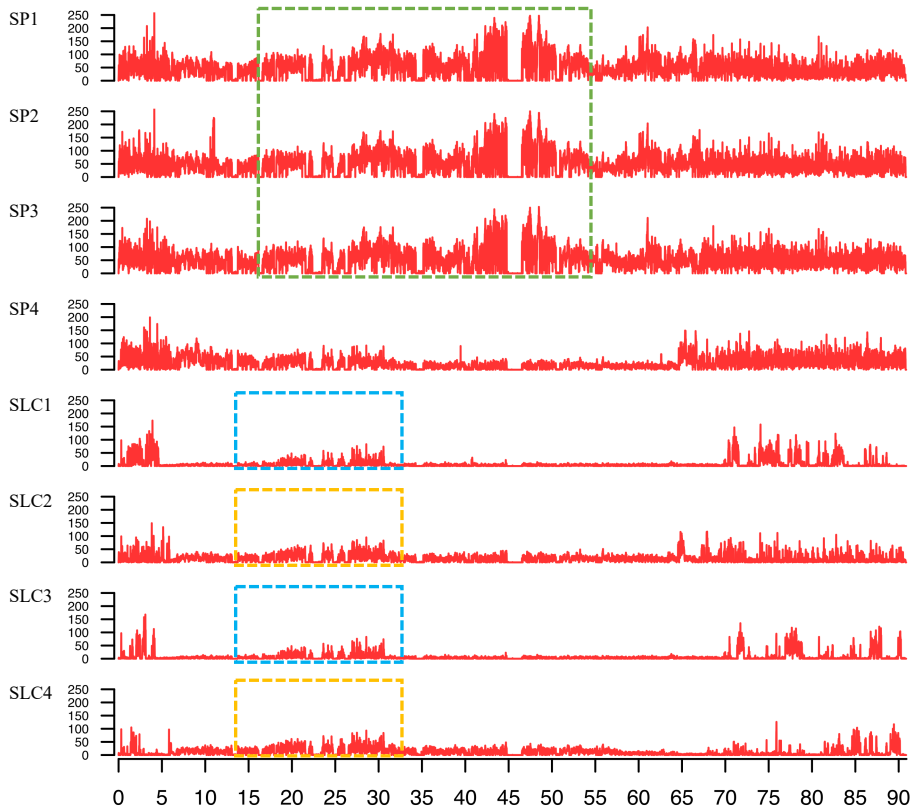

# Chromosome 2 homozygous variants

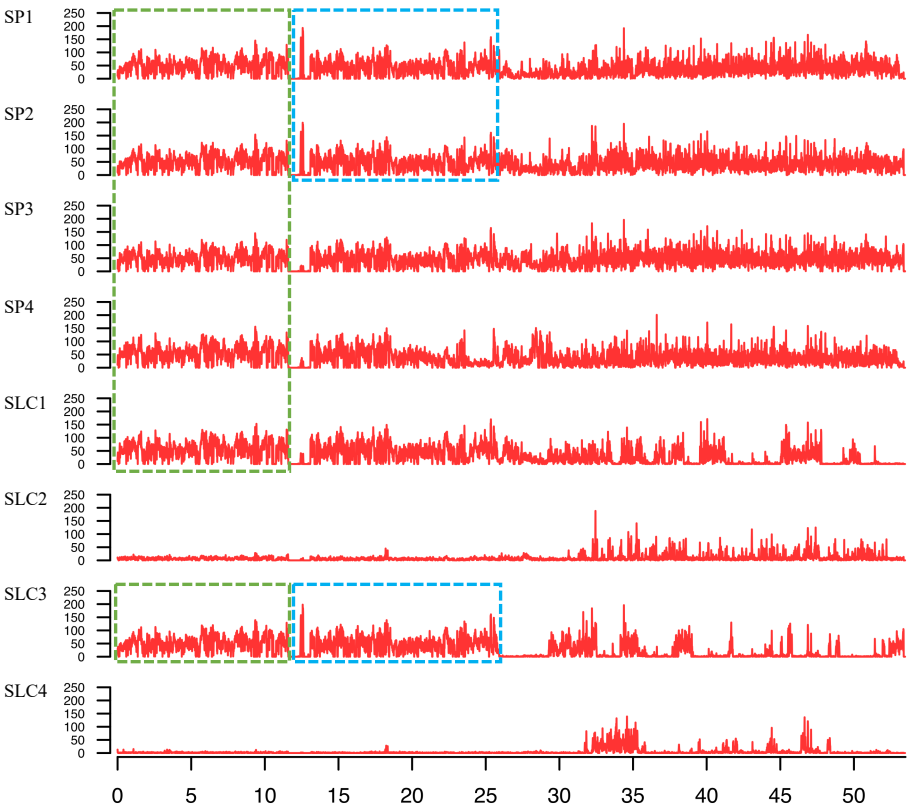

# Chromosome 3 homozygous variants

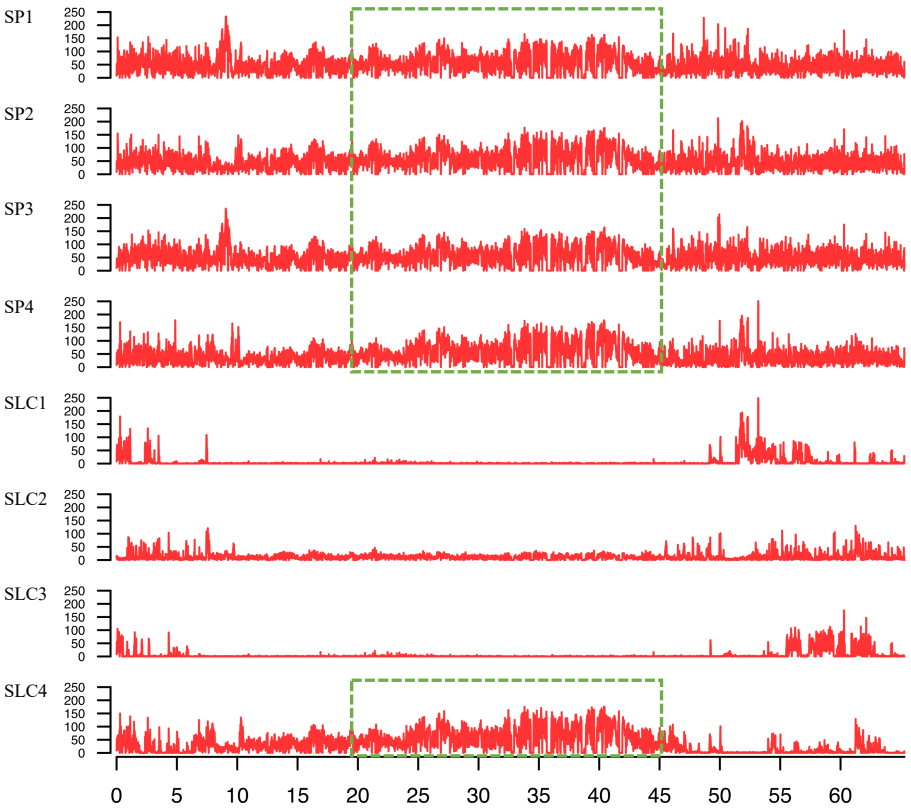

# Chromosome 4 homozygous variants

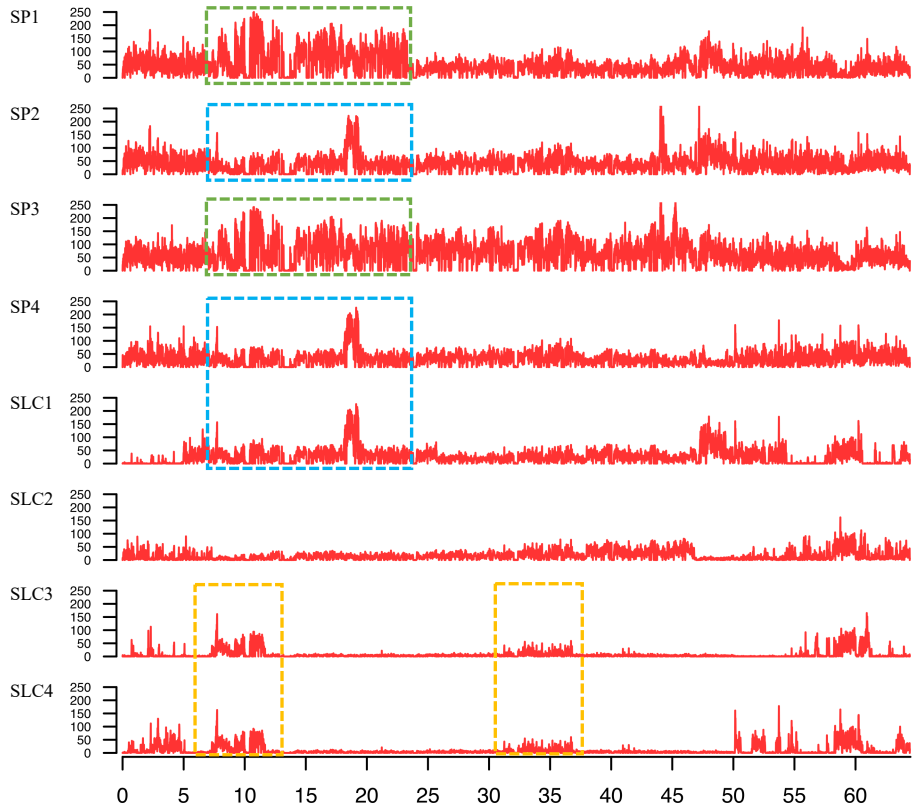

# Chromosome 5 homozygous variants

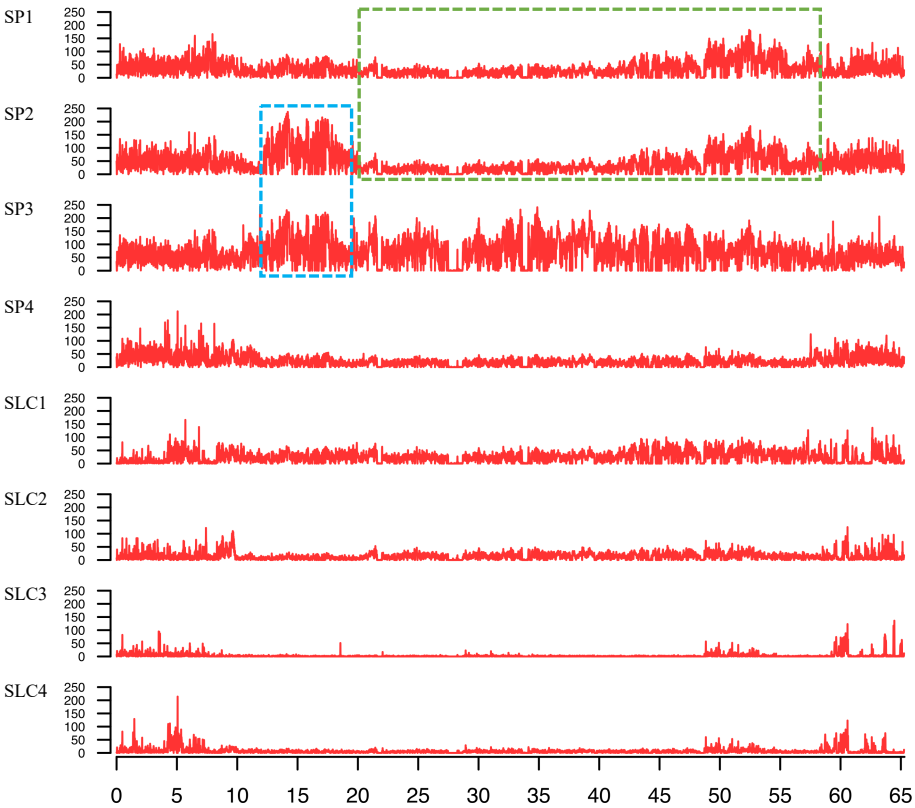

# Chromosome 6 homozygous variants

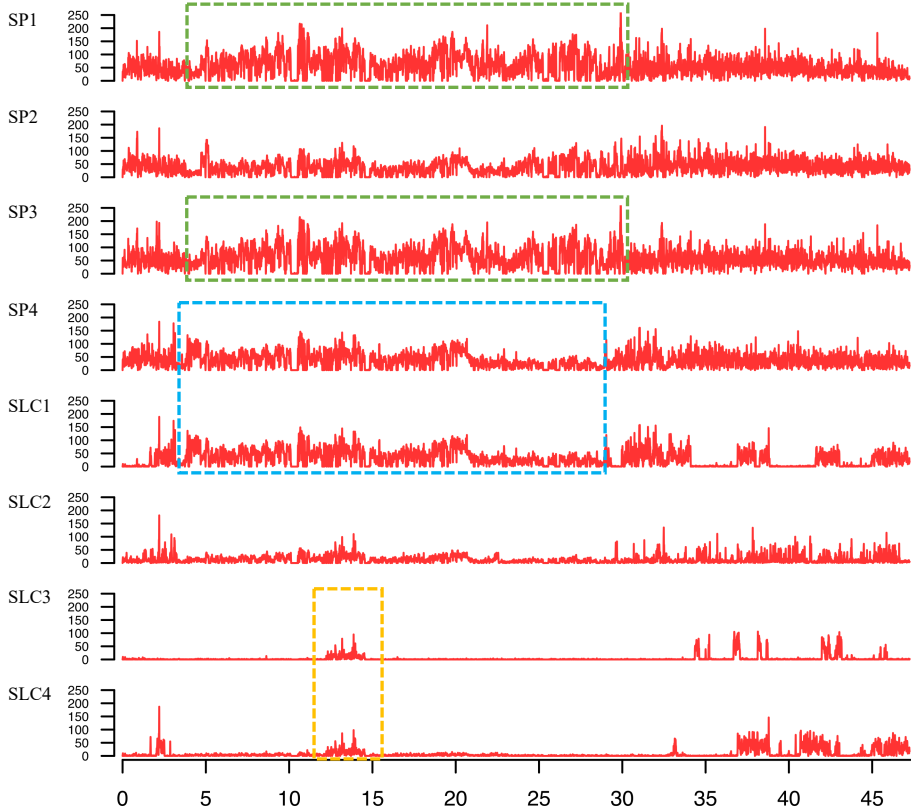

# Chromosome 7 homozygous variants

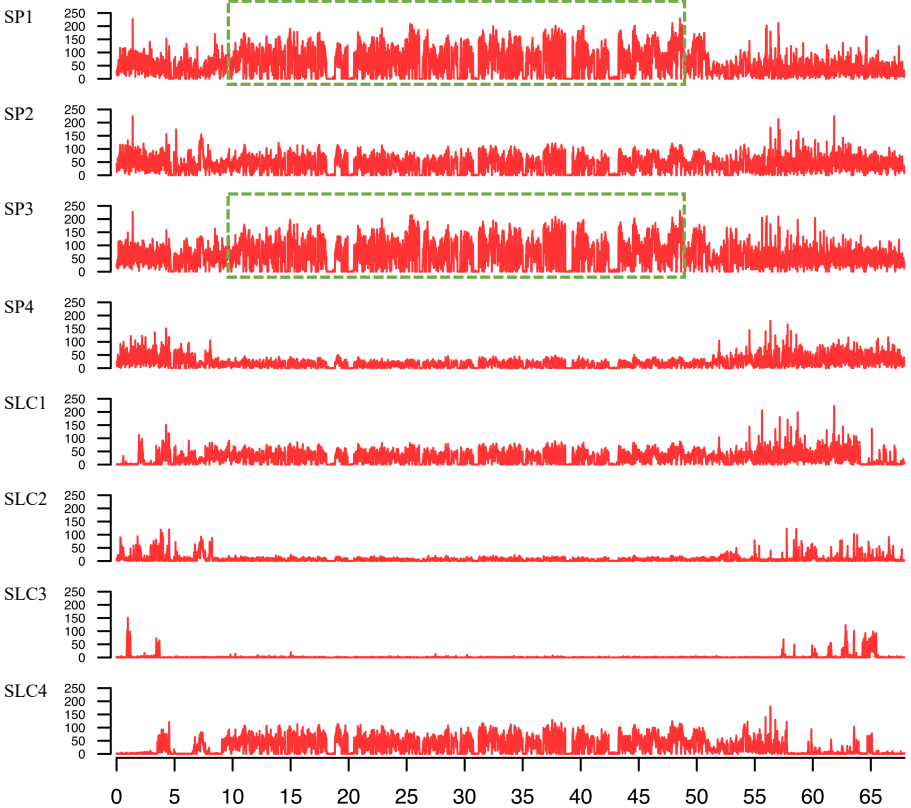



# Chromosome 8 homozygous variants

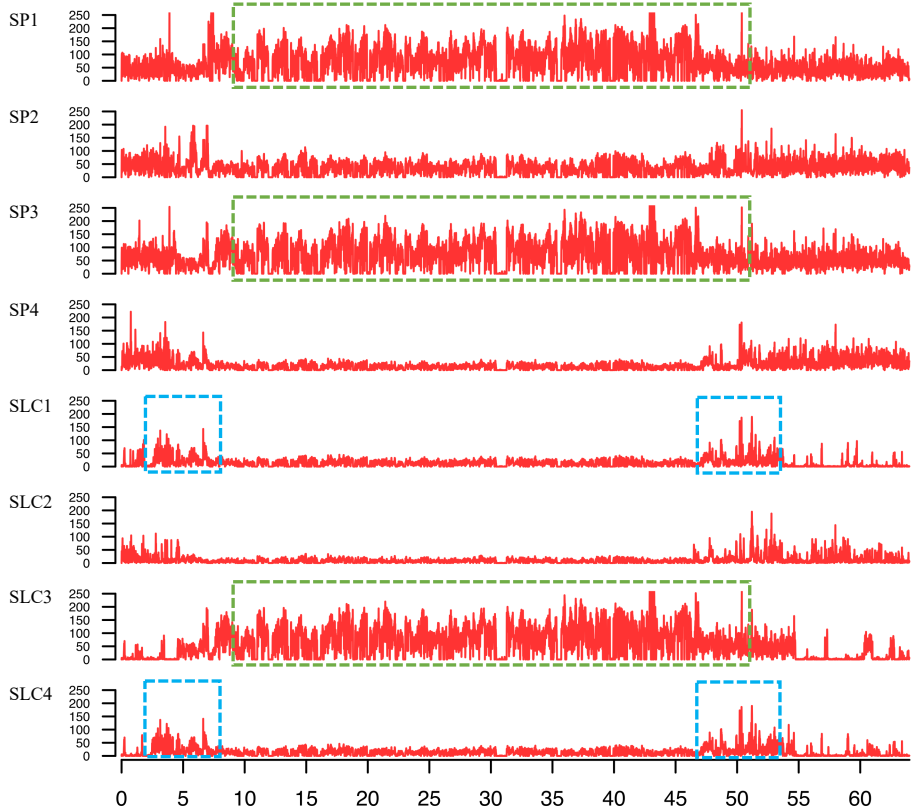

# Chromosome 9 homozygous variants

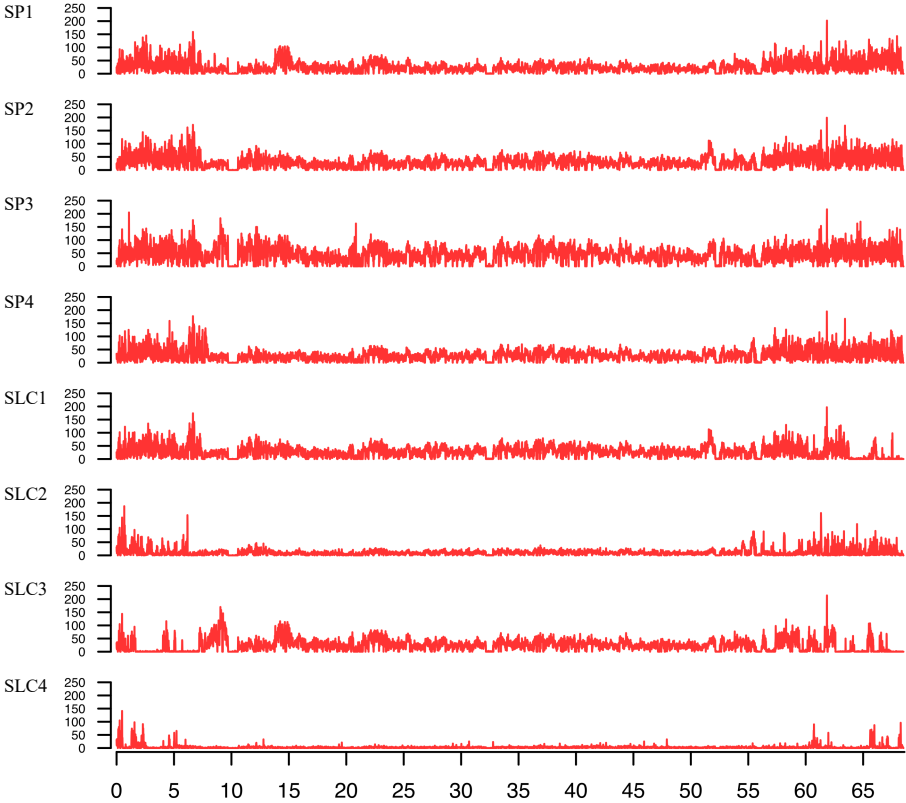

# Chromosome 10 homozygous variants

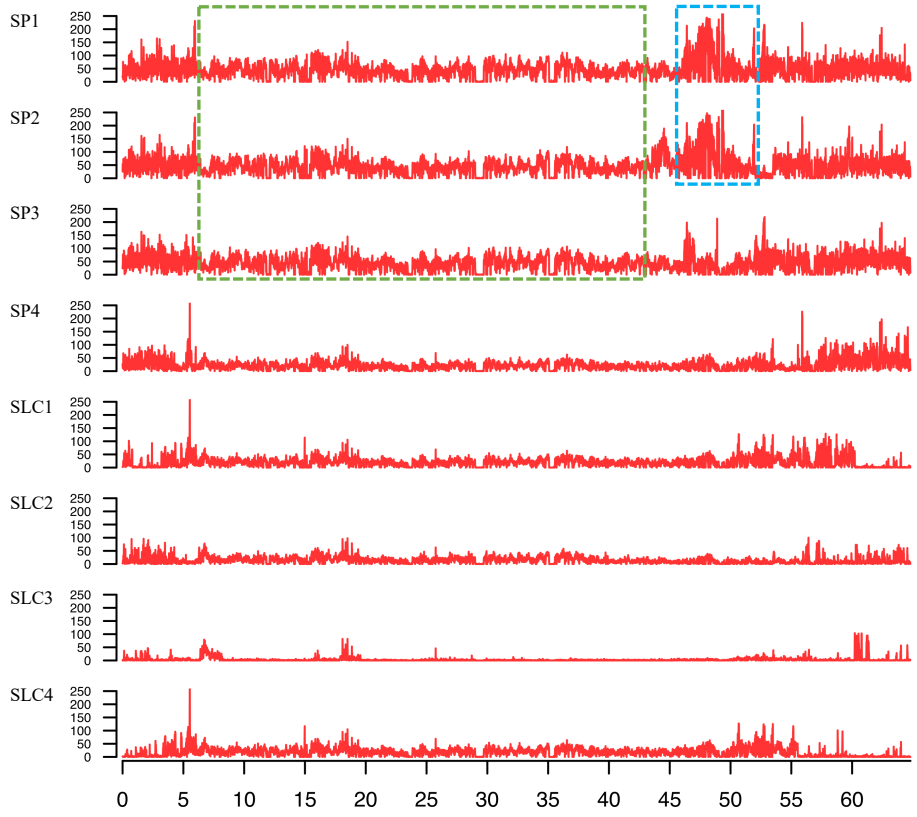

# Chromosome 11 homozygous variants

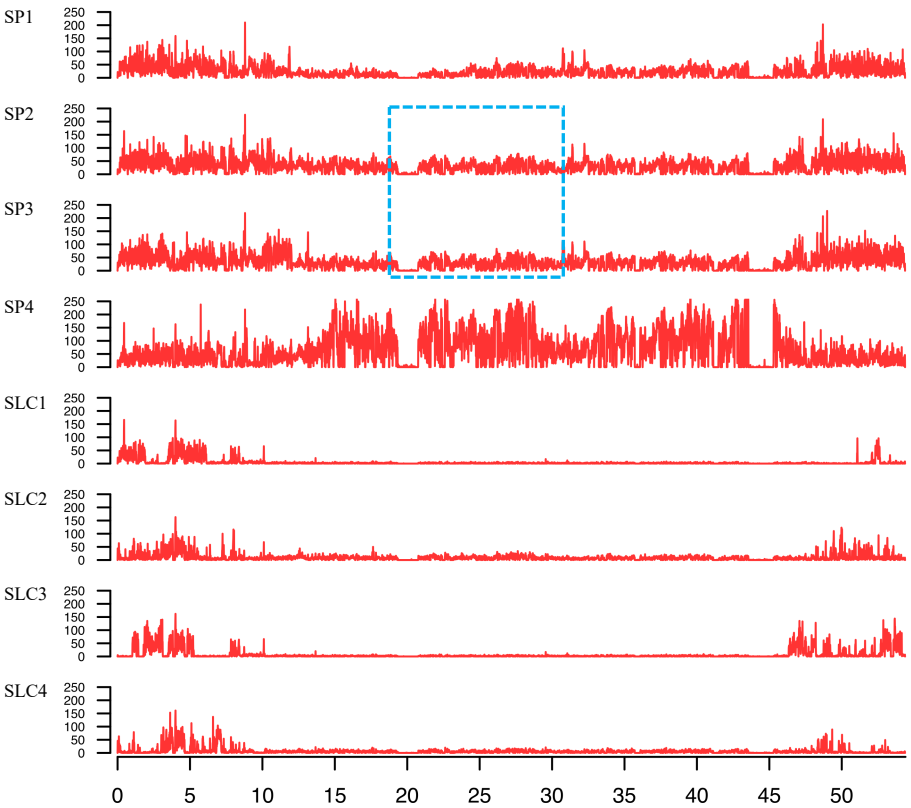

# Chromosome 12 homozygous variants

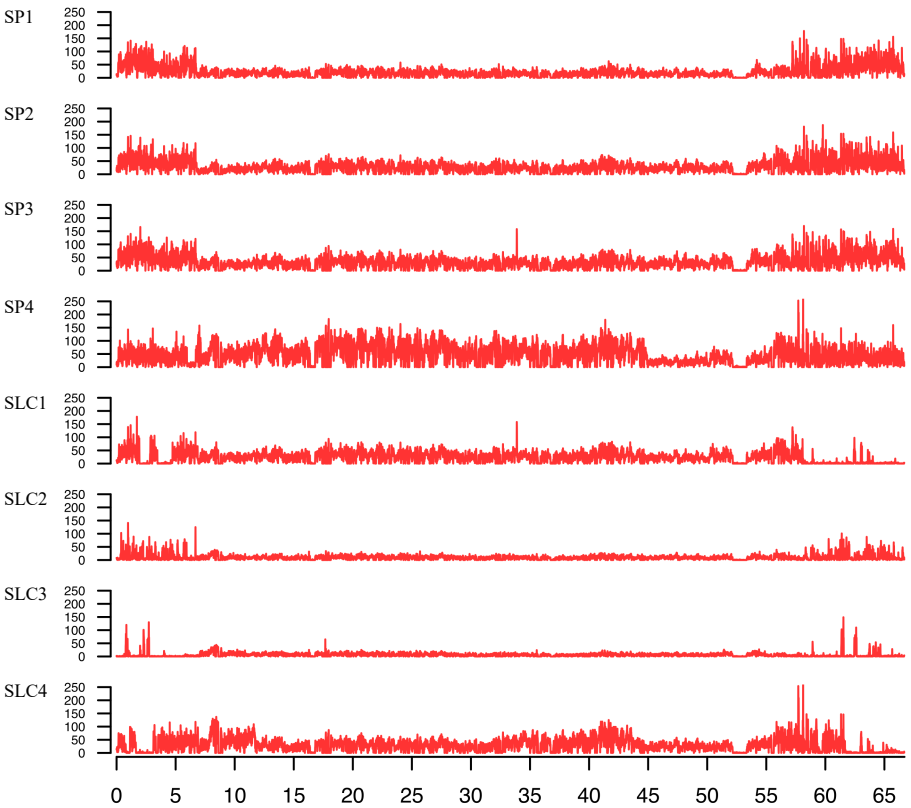

# Chromosome 1 heterozygous variants

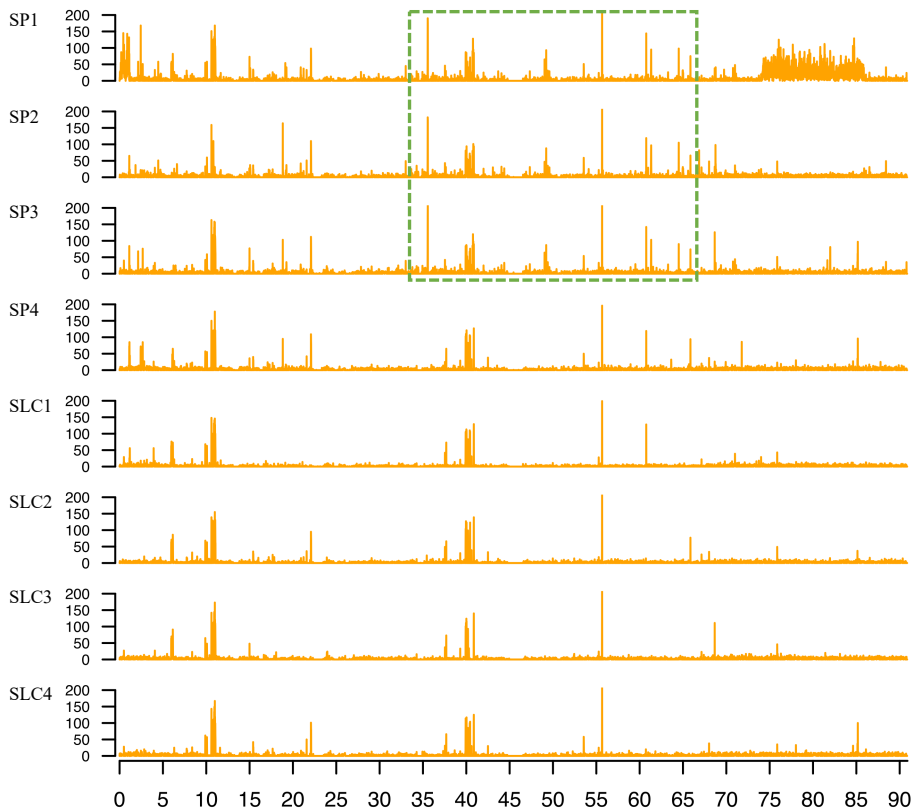

# Chromosome 2 heterozygous variants

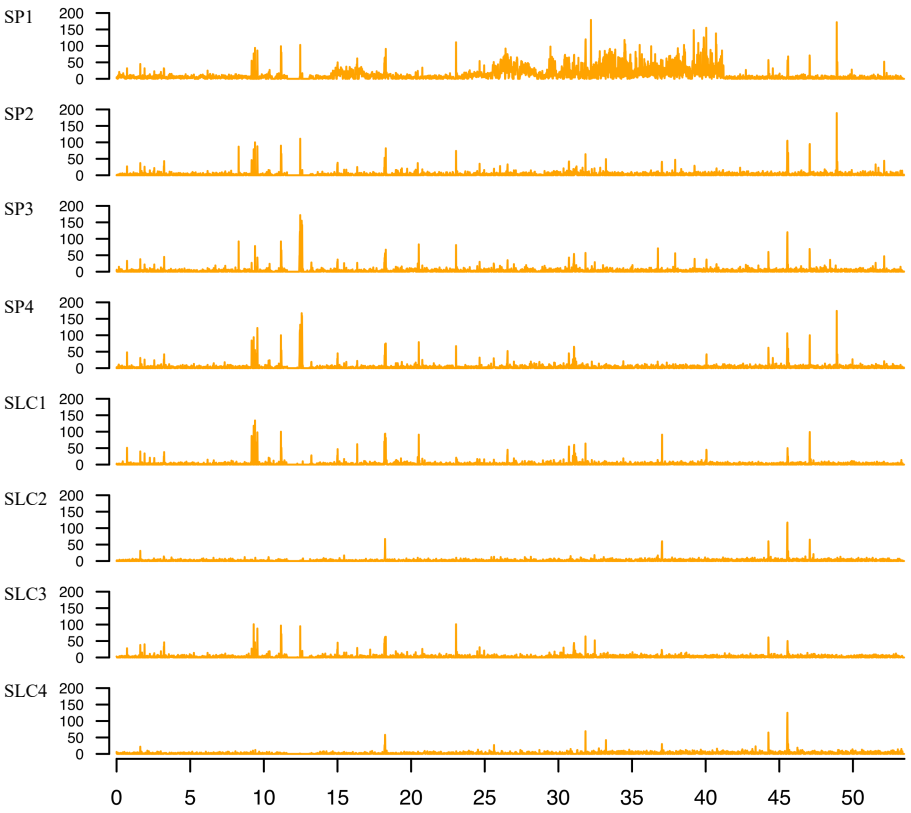

# Chromosome 3 heterozygous variants

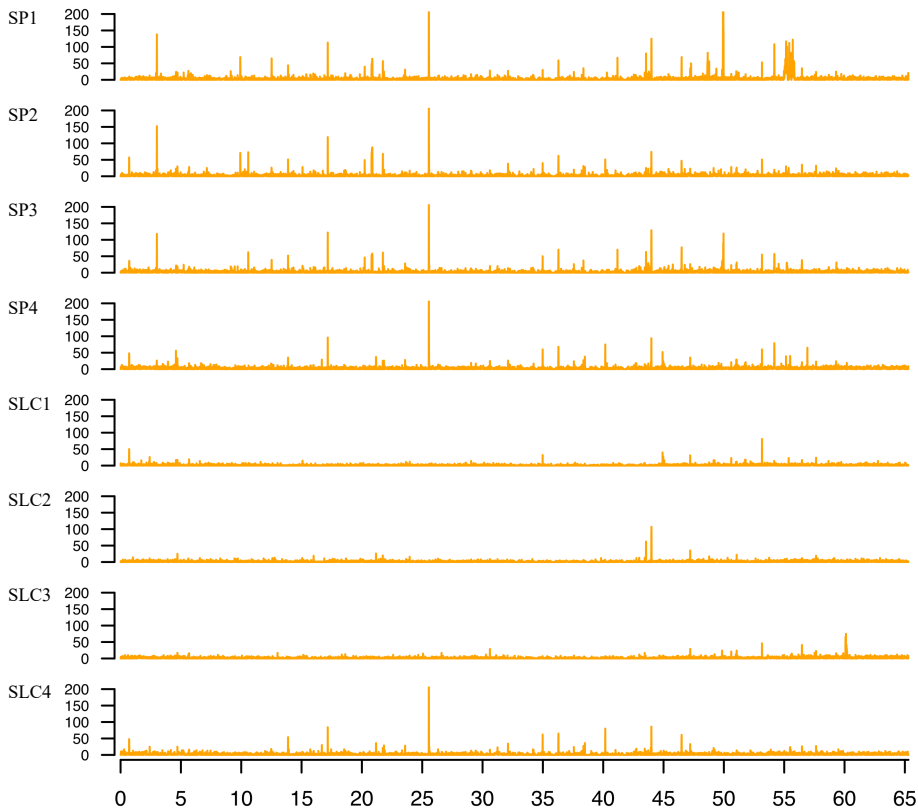



# Chromosome 4 heterozygous variants

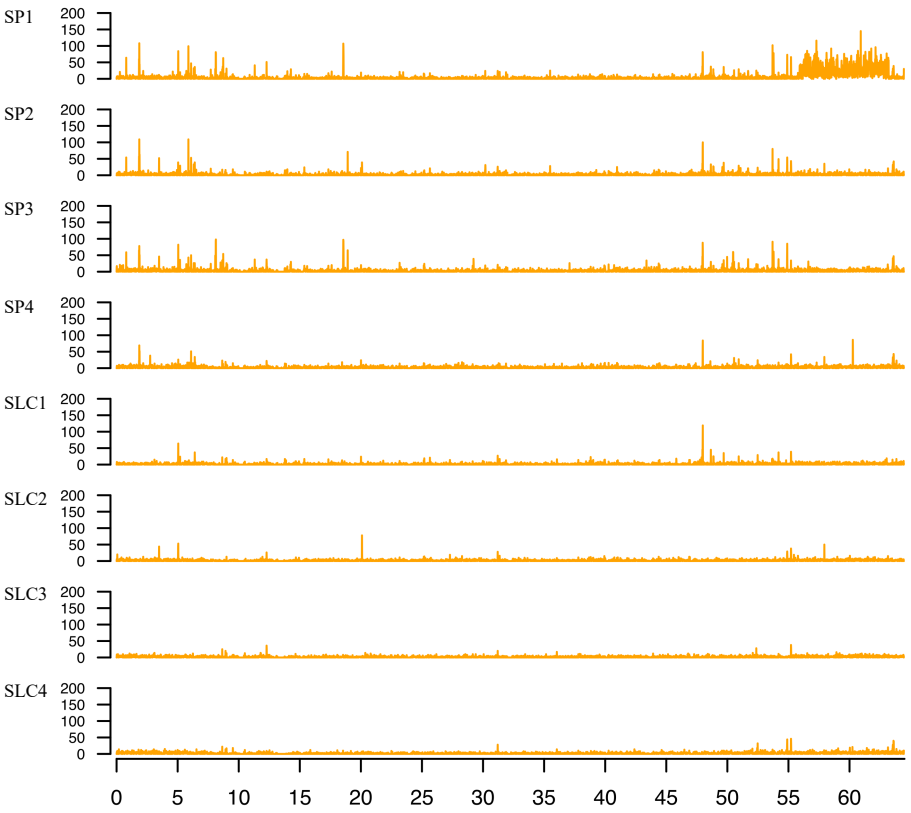



# Chromosome 6 heterozygous variants

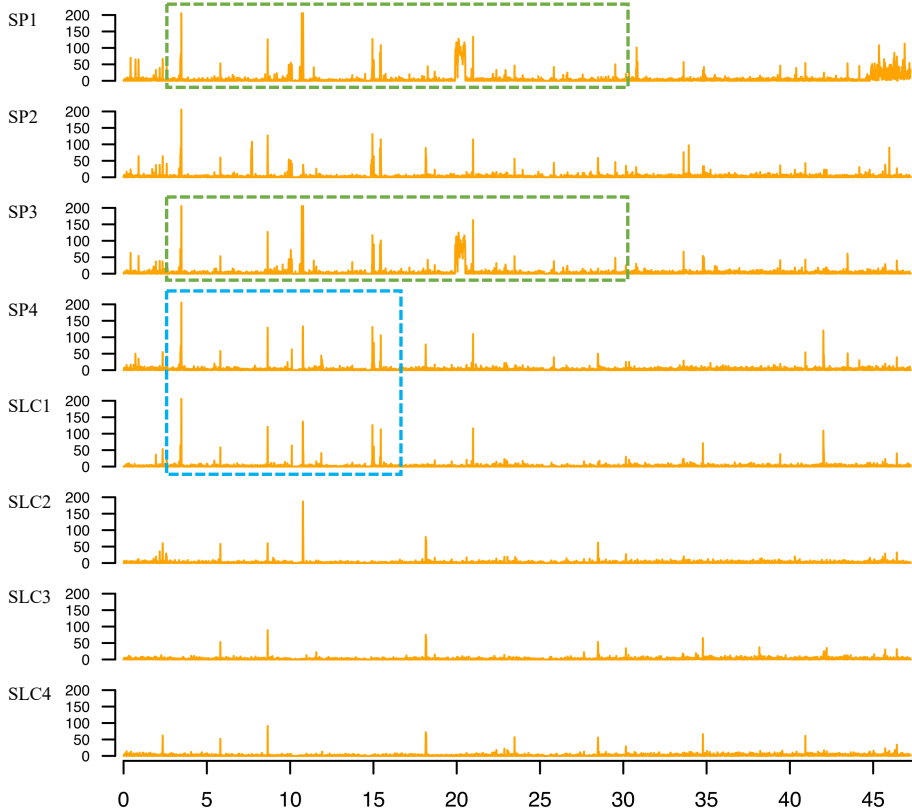

# Chromosome 7 heterozygous variants

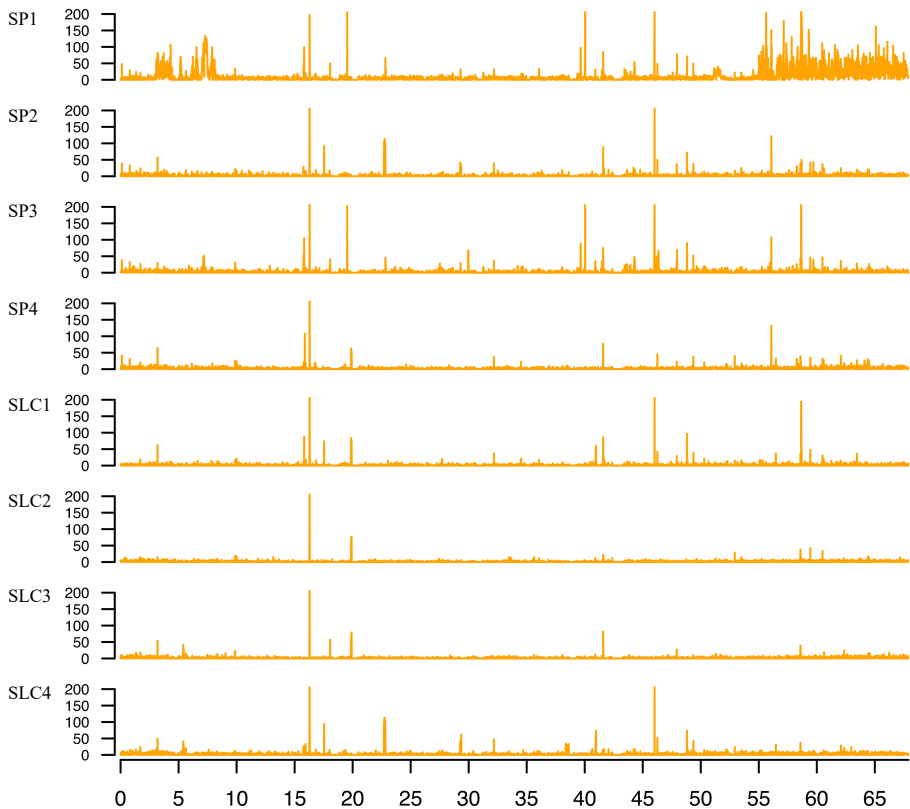

# Chromosome 8 heterozygous variants

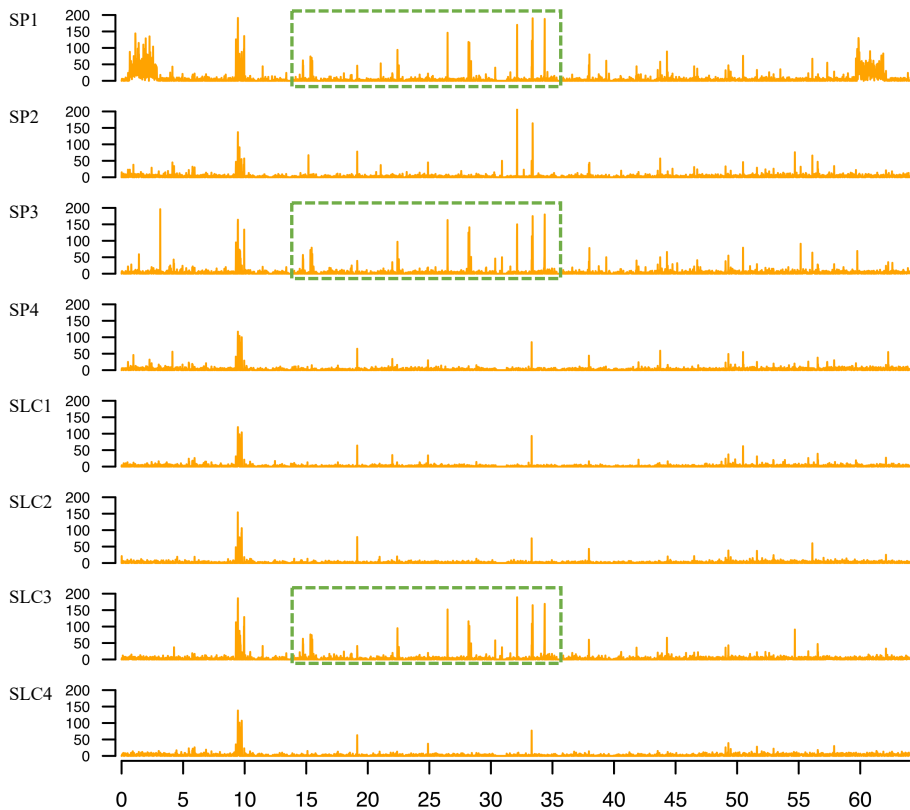

# Chromosome 9 heterozygous variants

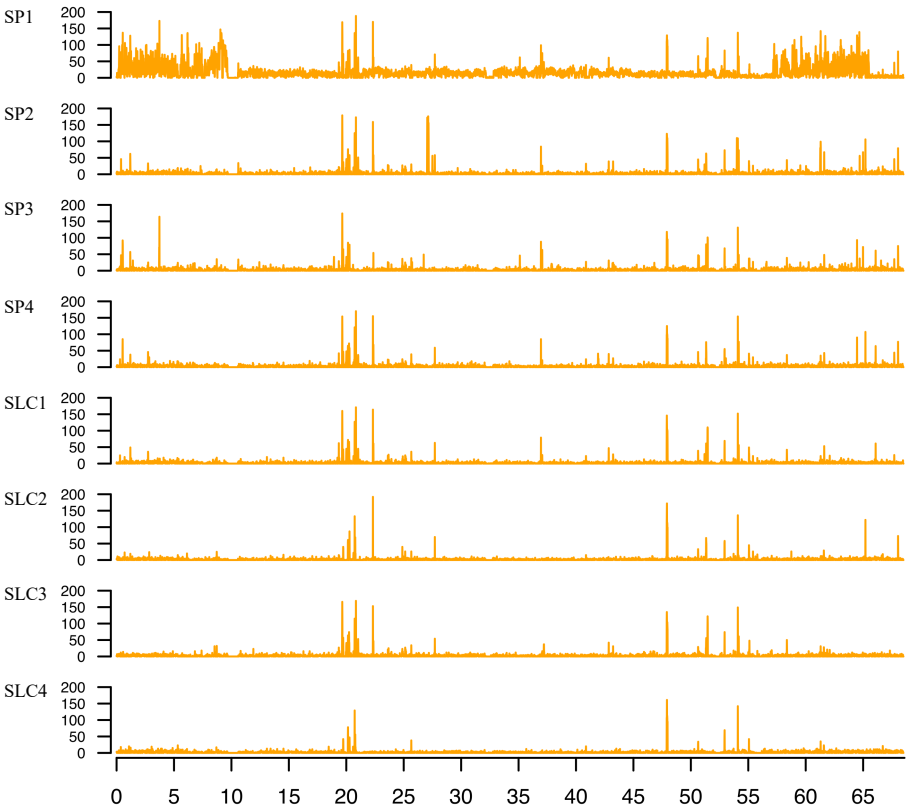

# Chromosome 10 heterozygous variants

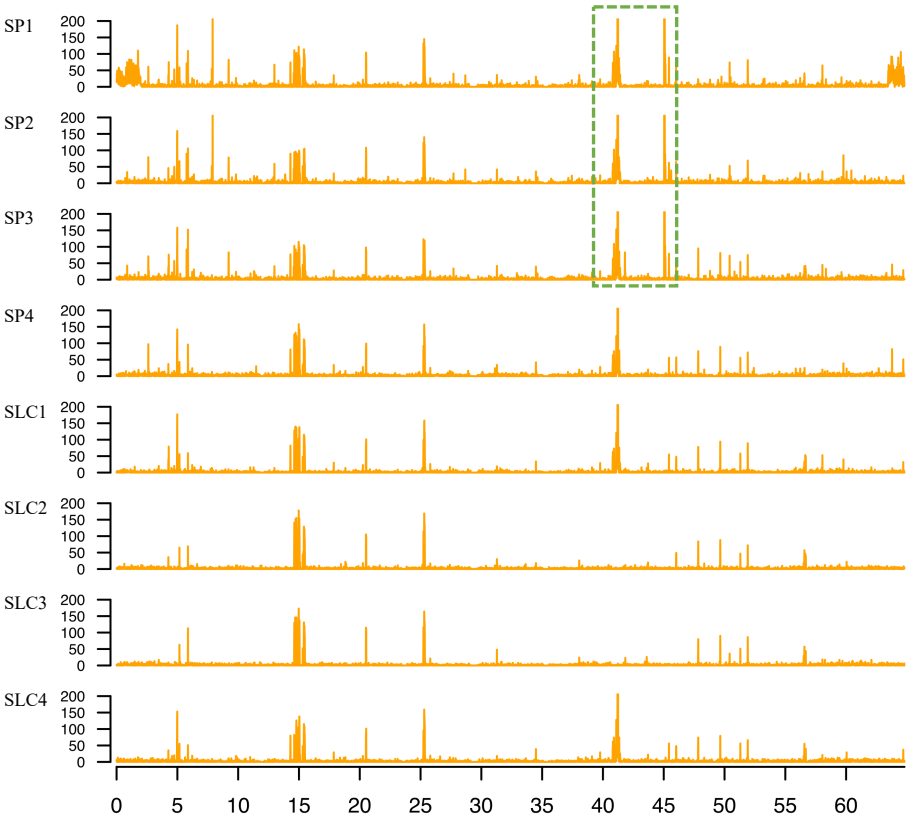

# Chromosome 11 heterozygous variants

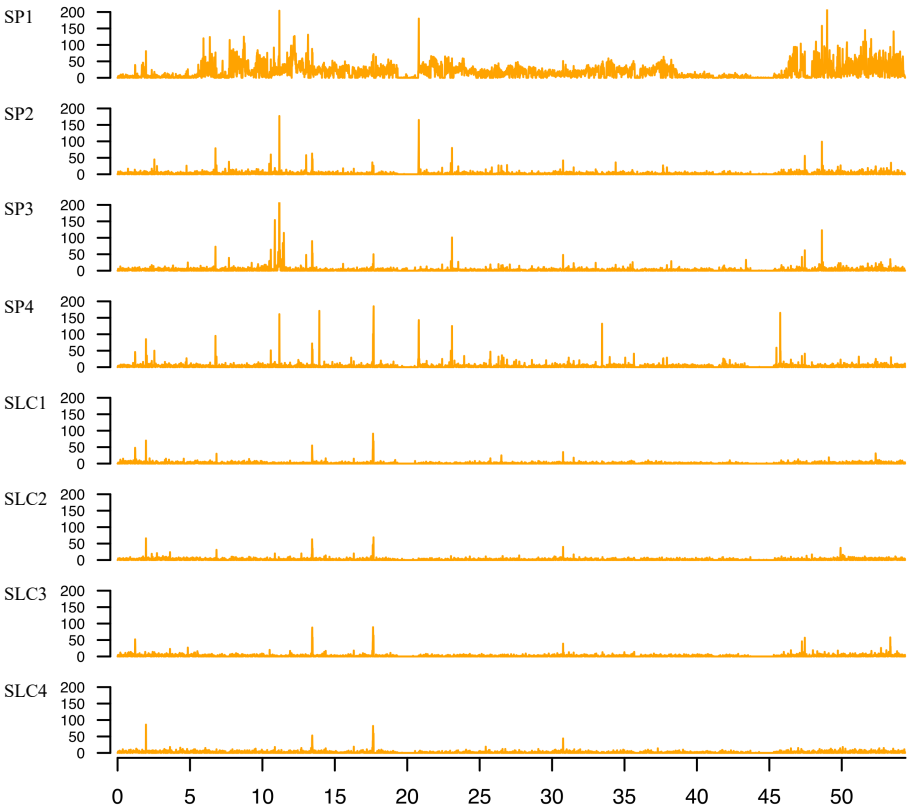



# Chromosome 12 heterozygous variants

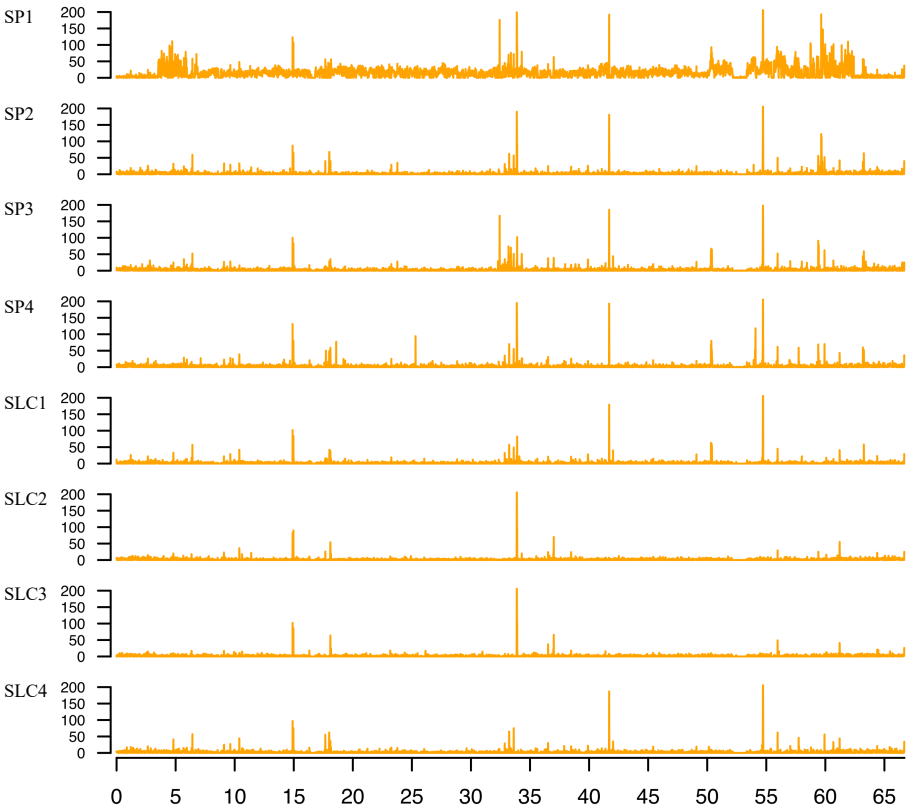

Supplement: 41438_2020_395_MOESM7_ESM.pdf [file 41438_2020_395_MOESM7_ESM.pdf]
